# Supplementary material
Source: publisher site journal article supplement (https://www.spandidos-publications.com/6155/downloadSupplementary)
Supplement: Supplementary file 1 [file downloadSupplementary]

**Table SI.** Detailed clinical information of the patients.

| <b>Patient no.</b> | <b>Sex</b> | <b>Age, years</b> | <b>TNM stage</b> | <b>Clinical stage</b> | <b>RD of left parotid gland, mGy</b> | <b>RD of right parotid gland, mGy</b> |
|--------------------|------------|-------------------|------------------|-----------------------|--------------------------------------|---------------------------------------|
| 1                  | M          | 51                | T2N1M0           | II                    | 3274.1                               | 3191.8                                |
| 2                  | F          | 27                | T3N2M0           | III                   | 4220.1                               | 3658.5                                |
| 3                  | M          | 38                | T3N2M0           | III                   | 4031.7                               | 4057.3                                |
| 4                  | F          | 46                | T2N2M0           | III                   | 3716.5                               | 3702.3                                |
| 5                  | M          | 50                | T2N3M0           | IVa                   | 3801.1                               | 3864.9                                |
| 6                  | M          | 32                | T4N1M0           | IVa                   | 3393.8                               | 6897.5                                |
| 7                  | M          | 49                | T2N1M0           | IVa                   | 3838.4                               | 4034.9                                |
| 8                  | M          | 51                | T2N2M0           | II                    | 3370.0                               | 3104.8                                |
| 9                  | M          | 53                | T2N0M0           | IVa                   | 3802.3                               | 3787.3                                |
| 10                 | M          | 59                | T2N0M0           | II                    | 3440.7                               | 3613.6                                |
| 11                 | M          | 40                | T2N1M0           | II                    | 3771.4                               | 3628.8                                |
| 12                 | F          | 50                | T2N1M0           | II                    | 4714.9                               | 4141.6                                |
| 13                 | M          | 48                | T3N2M0           | III                   | 4001.5                               | 3770.9                                |
| 14                 | M          | 59                | T2N1M0           | II                    | 3714.8                               | 3703.0                                |
| 15                 | M          | 51                | T2N2M0           | III                   | 3597.9                               | 3546.7                                |
| 16                 | M          | 56                | T3N1M0           | III                   | 3629.4                               | 3548.4                                |
| 17                 | M          | 36                | T4N1M0           | IVa                   | 3138.2                               | 3076.5                                |
| 18                 | F          | 42                | T4N2M0           | IVa                   | 4356.9                               | 4164.8                                |

RD, radiation dose; F, female; M, male; TNM, Tumor-Node-Metastasis.
